# Supplementary material for: Thermoplastic polyurethane with controllable degradation and critical anti-fouling properties
Source: Royal Society of Chemistry journal article supplement (doi:10.1039/d0bm01967d), 2020-12-24
Supplement: d0bm01967d1.pdf [file d0bm01967d1.pdf]

## Supplemental Materials for

Thermoplastic polyurethane with controllable degradation and critical anti-fouling properties

Huifeng Wang,<sup>1</sup> Xuan Liu,<sup>1</sup> Daniel Edward Christiansen,<sup>1</sup> Seyyedfaridoddin Fattahpour,<sup>1</sup> Kun Wang,<sup>1</sup> Haiqing Song,<sup>1</sup> Shafiqh Mehraeen,<sup>1</sup> Gang Cheng\*<sup>1</sup>

\*Corresponding Author: Dr. Gang Cheng E-mail: [gancheng@uic.edu](mailto:gancheng@uic.edu)

### **This File Includes:**

Experimental Section

Scheme S1. Synthetic route for HMP, CB-diol, and PCBDU.

Figure S1. <sup>1</sup>H NMR spectrum for HMP.

Figure S2. <sup>1</sup>H NMR spectrum for HAMAP (CB-diol).

Figure S3. <sup>1</sup>H NMR spectrum for PCBDU.

Figure S4. FT-IR spectra for PCLDU-10 and PEGCU-7.

Figure S5. DSC profiles for PCLDU-10 and PEGCU-7 (a) cooling curve (b) heating curve.

Figure S6. TGA profiles for PCLDU-10 and PEGCU-7.

Figure S7. Compression test of PCBDU-1 with different hydrolysis time.

Figure S8. Hydrolysis process of PCBDU-1 monitored by pH.

Figure S9. GPC spectrum for PCBDU-1.

Figure S10. GPC spectrum for PCLDU-10 and PEGCU-7.

Figure S11. Images of the attachment of NIH-3T3 fibroblast cells on PCLDU-10, PEGCU-7, PCBDU-1, and PCBDU-7 (after hydrolysis) after 1, 3, 7, and 14 days immersed in 100% FBS.

Figure S12. Images of the attachment of NIH-3T3 fibroblast cells on PCLDU-10, PEGCU-7, PCBDU-1, and PCBDU-7 (before hydrolysis) after 1, 3, 7, and 14 days immersed in 100% FBS.

Table S1. The weight percentage of each sample.

Table S2. Cell densities on PCBDU-1 (after hydrolysis) and control surfaces with different times immersed in FBS.

Table S3. Cell densities on PCBDU-1 (before hydrolysis) and control surfaces with different times immersed in FBS.

Table S4. Cell densities on PCBDU-1 (before hydrolysis) and control surfaces with different times immersed in cell solution.

## **Synthesis of poly(carboxybetaine) degradable urethane (PCBDU)**

### **1. Synthesis of PCBDU-1**

A temperature controller and a nitrogen inlet were added to a 250 mL three-necked round bottom flask with a mechanical stirrer to melt PCL-diol (8.92 g, 4.46 mmol). After melting, hexamethylene diisocyanate (HDI) (1.5g, 8.91 mmol) was added dropwise into the flask; moreover, 20 mL DMF was added to reduce the viscosity. This prepolymer solution was stirred for 2 h at 80 °C. CB-diol (1.17 g, 4.46 mmol) was added to the solution dropwise, and the solution was stirred for a further 30 min. The resulting solution was poured into a PTFE plate, which was subsequently placed in an oven at 100 °C for 12 h to enable the reaction to complete, and another 12 h to remove the residual solvent.

### **2. Synthesis of PCBDU-3**

A temperature controller and a nitrogen inlet were added to a 250 mL three-necked round bottom flask with a mechanical stirrer to melt PCL-diol (4.46 g, 2.23 mmol). After melting, hexamethylene diisocyanate (HDI) (1.5 g, 8.91 mmol) was added dropwise into the flask; moreover, 20 mL DMF was added to reduce the viscosity. This prepolymer solution was stirred for 2 h at 80 °C. CB-diol (1.75g, 6.69 mmol) was added to the solution dropwise, and the solution was stirred for a further 30 min. The resulting solution was poured into a PTFE plate, which was subsequently placed in an oven at 100 °C for 12 h to enable the reaction to complete, and another 12 h to remove the residual solvent.

### **3. Synthesis of PCBDU-5**

A temperature controller and a nitrogen inlet were added to a 250 mL three-necked round bottom flask with a mechanical stirrer to melt PCL-diol (2.98 g, 1.49 mmol). After melting, hexamethylene diisocyanate (HDI) (1.5 g, 8.91 mmol) was added dropwise into the flask; moreover, 20 mL DMF

was added to reduce the viscosity. This prepolymer solution was stirred for 2 h at 80 °C. CB-diol (1.95 g, 7.43 mmol) was added to the solution dropwise, and the solution was stirred for a further 30 min. The resulting solution was poured into a PTFE plate, which was subsequently placed in an oven at 100 °C for 12 h to enable the reaction to complete, and another 12 h to remove the residual solvent.

#### **4. Synthesis of PCBDU-7**

A temperature controller and a nitrogen inlet were added to a 250 mL three-necked round bottom flask with a mechanical stirrer to melt PCL-diol (2 g, 1 mmol). After melting, hexamethylene diisocyanate (HDI) (1.34 g, 8 mmol) was added dropwise into the flask; moreover, 20 mL DMF was added to reduce the viscosity. This prepolymer solution was stirred for 2 h at 80 °C. CB-diol (1.84g, 7 mmol) was added to the solution dropwise, and the solution was stirred for a further 30 min. The resulting solution was poured into a PTFE plate, which was subsequently placed in an oven at 100 °C for 12 h to enable the reaction to complete, and another 12 h to remove the residual solvent.

#### **5. Synthesis of Poly(ethylene glycol-co-carprolactone) urethane (PEGCU)**

A temperature controller and a nitrogen inlet were added to a 250 mL three-necked round bottom flask with a mechanical stirrer to melt PCL-diol (2.22 g, 1.11 mmol). After melting, hexamethylene diisocyanate (HDI) (1.5 g, 8.91 mmol) was added dropwise into the flask; moreover, 20 mL DMF was added to reduce the viscosity. This prepolymer solution was stirred for 2 h at 80 °C. PEG 300 (2.34 g, 7.80 mmol) was added to the solution dropwise, and the solution was stirred for a further 30 min. The resulting solution was poured into a PTFE plate, which was subsequently placed in an oven at 100 °C for 12 h to enable the reaction to complete, and another 12 h to remove the residual solvent.

## **6. Synthesis of Poly(carprolactone) degradable urethane (PCLDU)**

A temperature controller and a nitrogen inlet were added to a 250 mL three-necked round bottom flask with a mechanical stirrer to melt PCL-diol (5.94 g, 2.97 mmol). After melting, hexamethylene diisocyanate (HDI) (0.5 g, 2.97 mmol) was added dropwise into the flask; moreover, 20 mL DMF was added to reduce the viscosity. The resulting solution was poured into a PTFE plate, which was subsequently placed in an oven at 100 °C for 12 h to enable the reaction to complete, and another 12 h to remove the residual solvent.

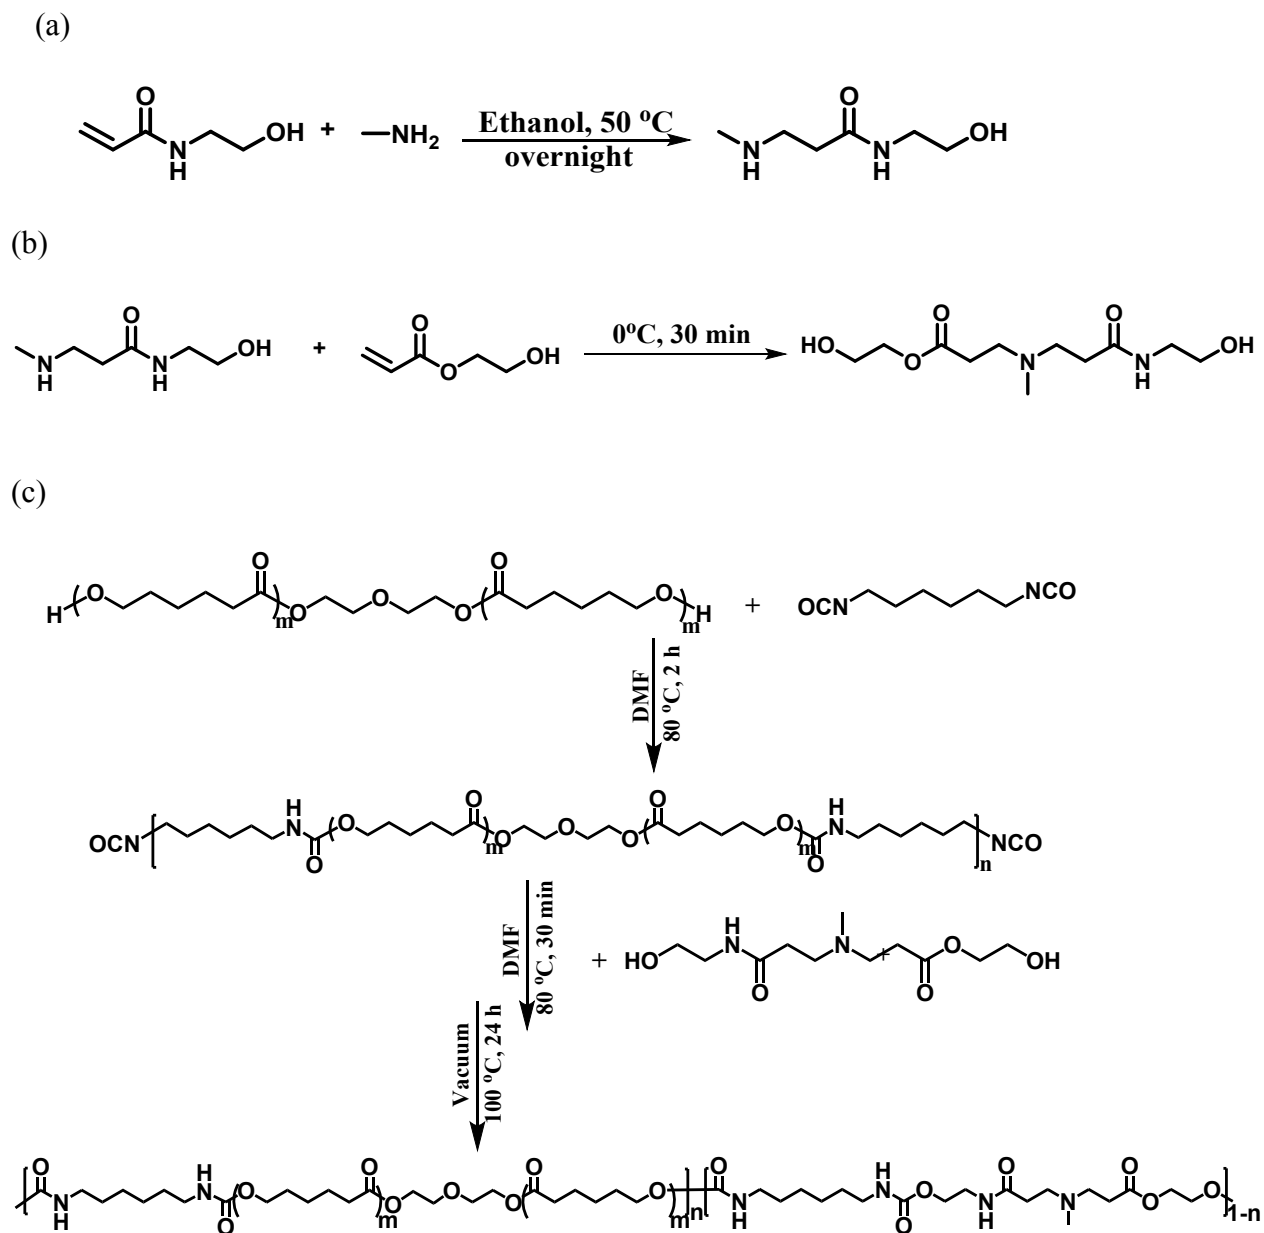

**Scheme S1.** Synthetic route of (a) HMP, (b) CB-diol and (c) PCBDU.

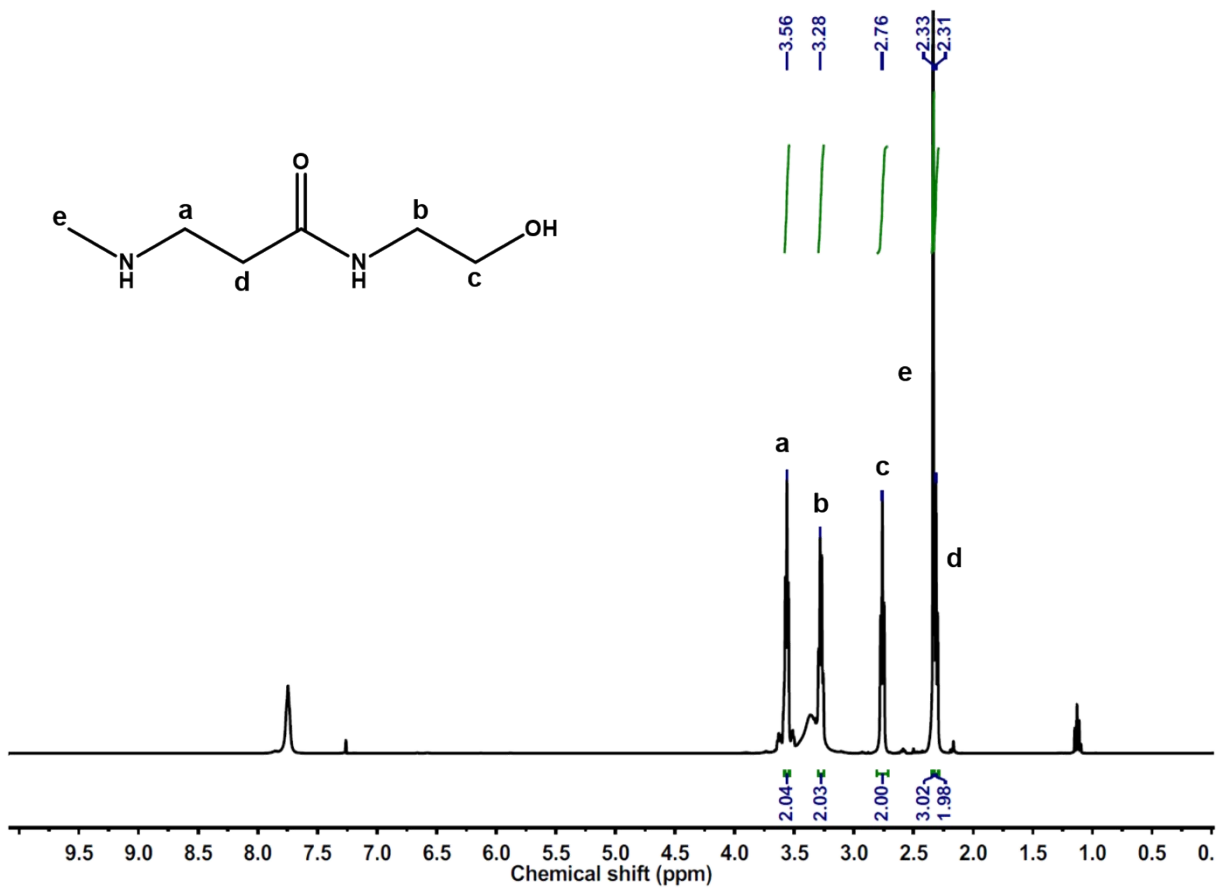

**Figure S1.** <sup>1</sup>H NMR spectrum for HMP.

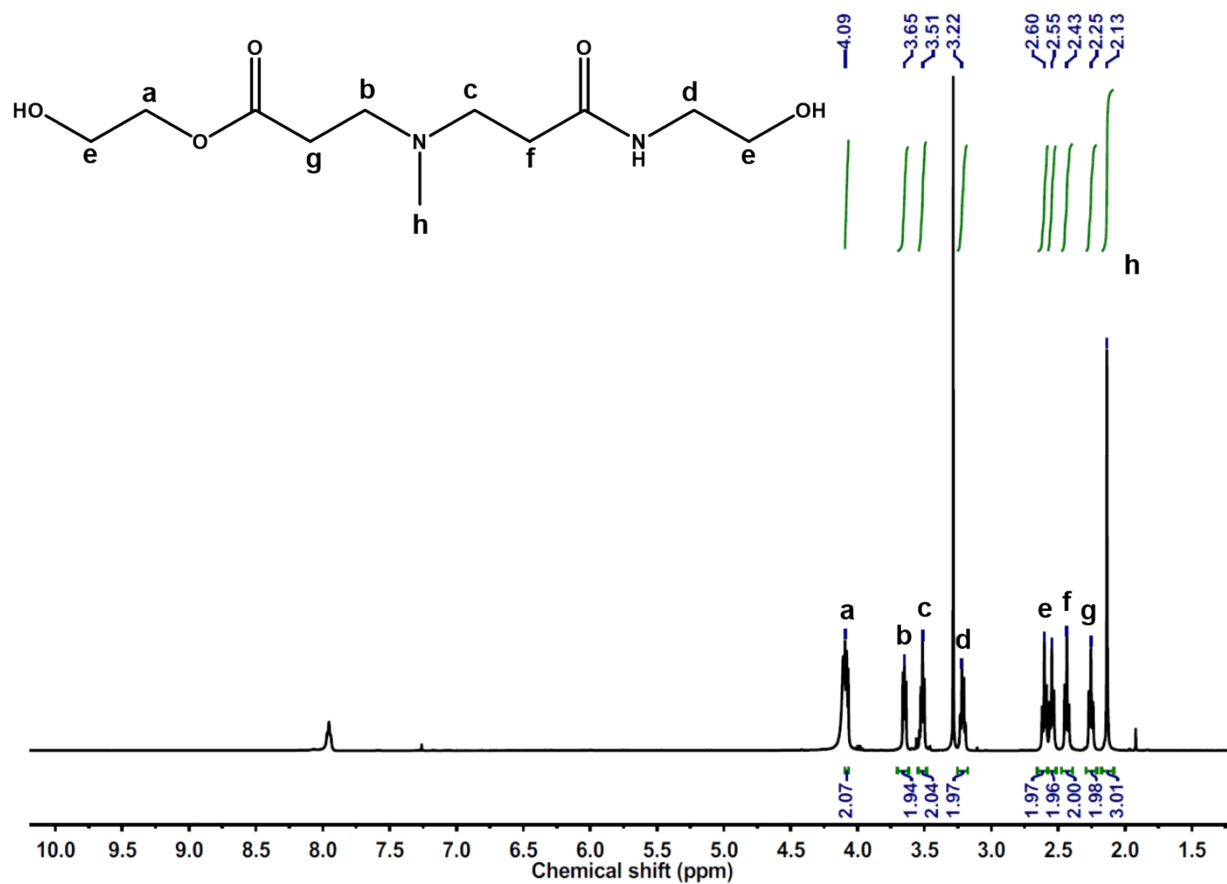

**Figure S2.** <sup>1</sup>H NMR spectrum for HAMAP.

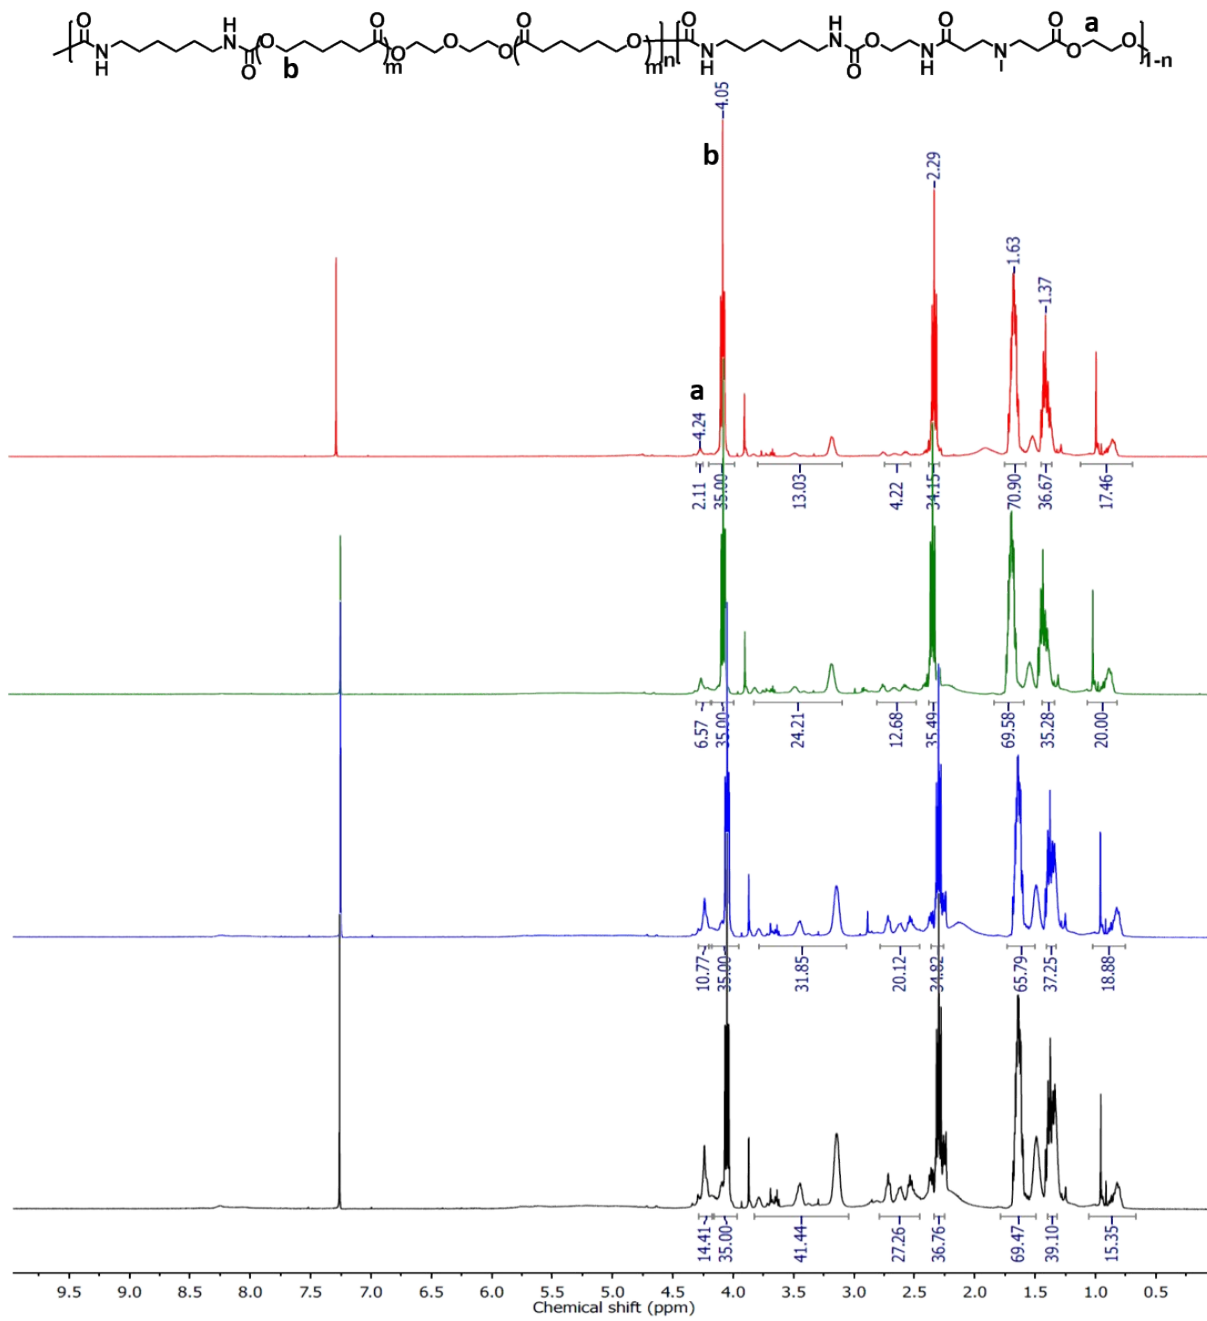

Figure S3. <sup>1</sup>H NMR spectrum for PCBDU.



**Table S1.** The mole percentage and weight percentage of different diols in each sample.

|          | PCL <sub>2000</sub> -diol<br>(mol%) | CB-diol<br>(mol%) | PEG <sub>300</sub> -diol<br>(mol%) | PCL <sub>2000</sub> -diol<br>(wt%) | CB-diol<br>(wt%) | PEG <sub>300</sub> -diol<br>(wt%) |
|----------|-------------------------------------|-------------------|------------------------------------|------------------------------------|------------------|-----------------------------------|
| PCBDU-1  | 25.0                                | 25.0              | \                                  | 77.0                               | 10.1             | \                                 |
| PCBDU-3  | 12.5                                | 37.5              | \                                  | 57.8                               | 22.7             | \                                 |
| PCBDU-5  | 8.3                                 | 41.7              | \                                  | 46.3                               | 30.4             | \                                 |
| PCBDU-7  | 6.3                                 | 43.8              | \                                  | 38.6                               | 35.4             | \                                 |
| PEGCU-7  | 6.3                                 | \                 | 43.8                               | 36.7                               | \                | 38.6                              |
| PCLDU-10 | 50.0                                | \                 | \                                  | 92.2                               | \                | \                                 |

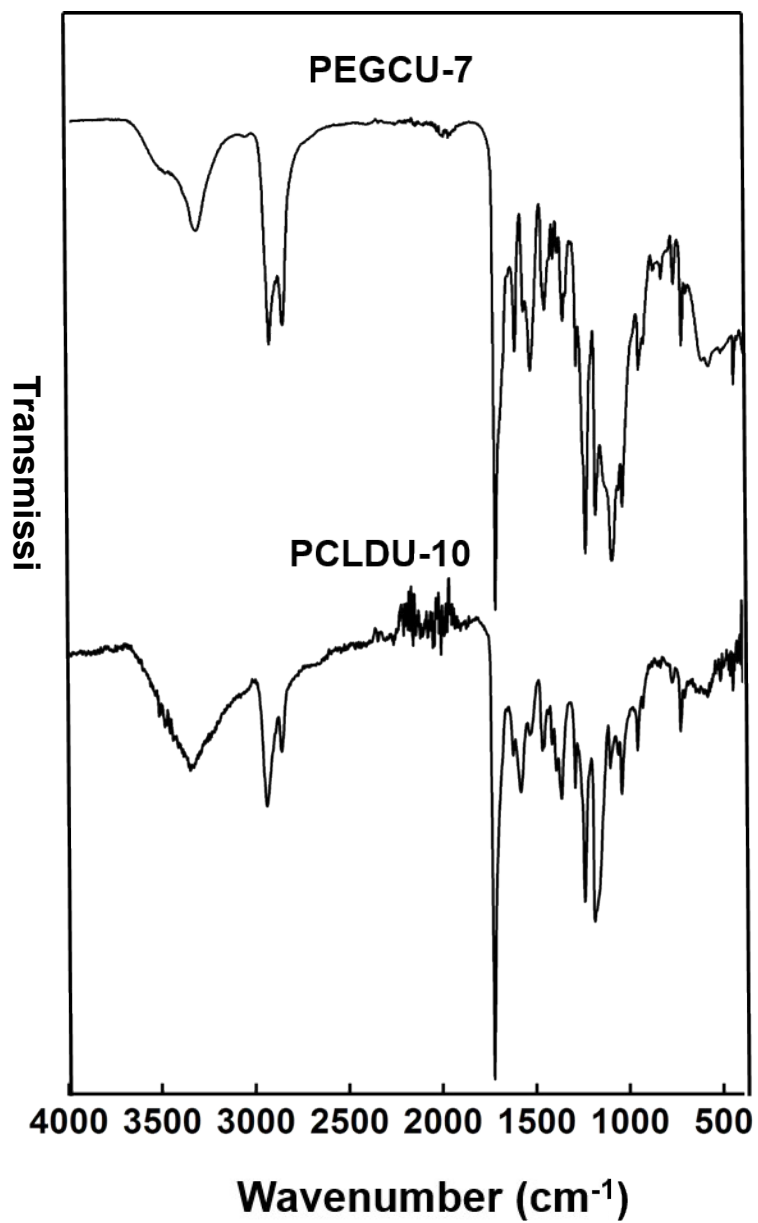

**Figure S4.** FT-IR spectra for PCLDU-10 and PEGCU-7.

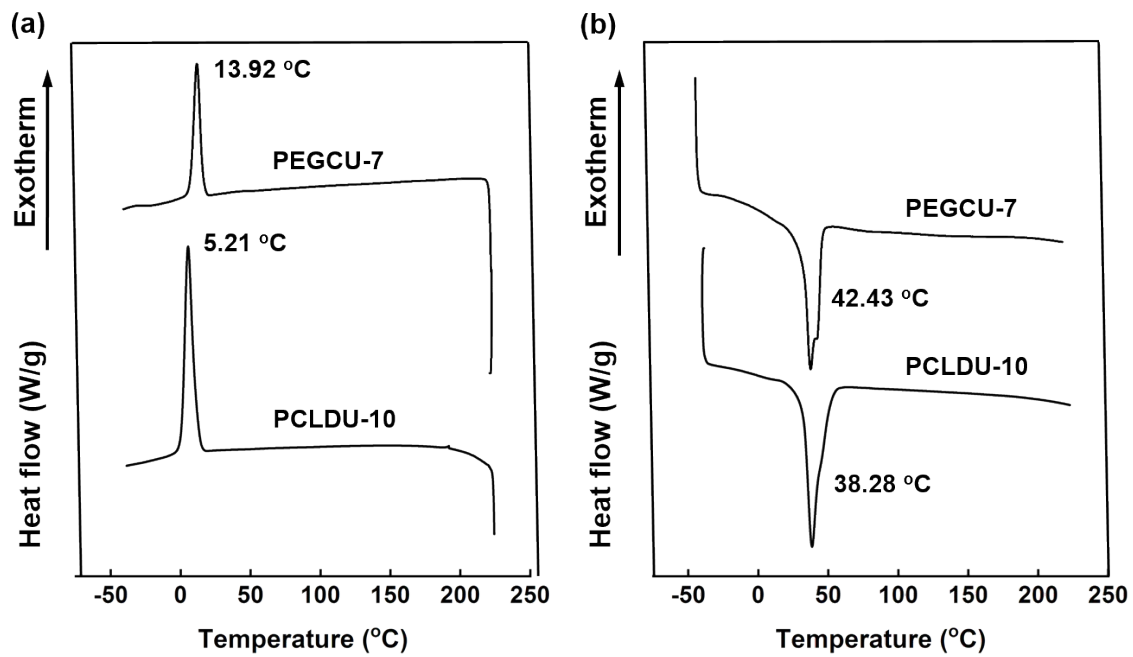

**Figure S5.** DSC profiles for PCLDU-10 and PEGCU-7 (a) cooling curve (b) heating curve.

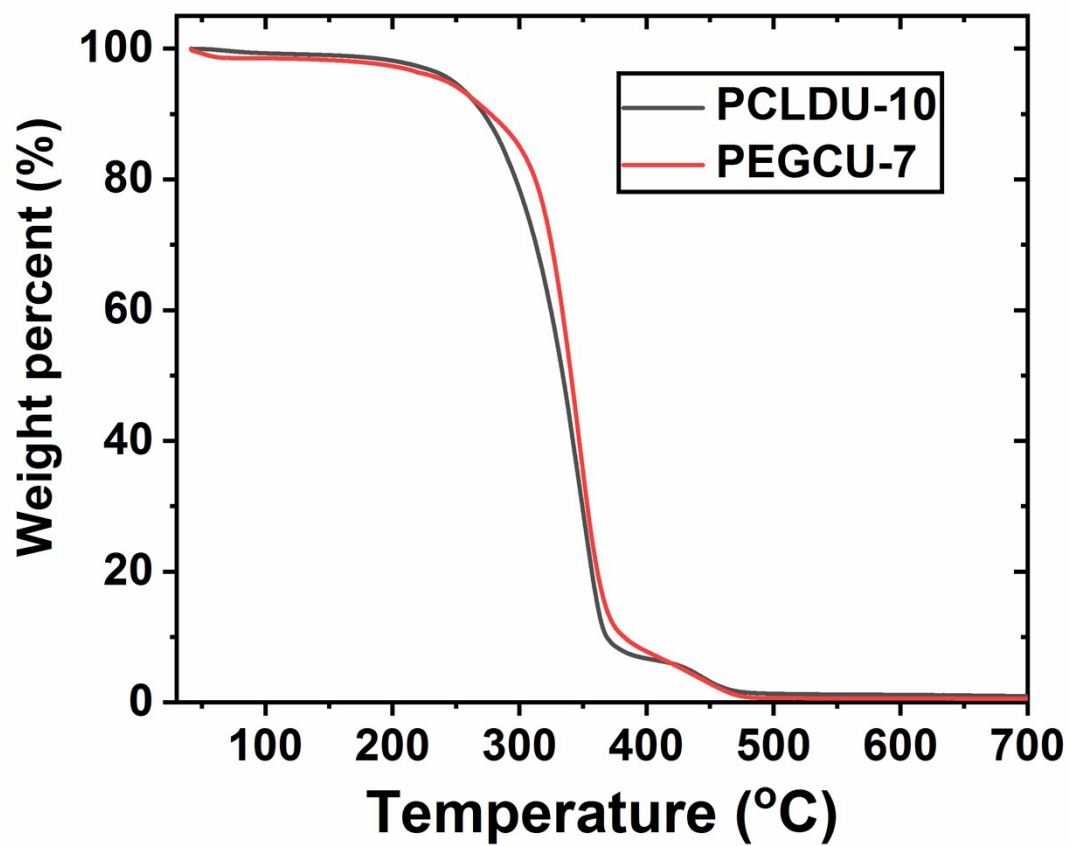

Figure S6. TGA profiles for PCLDU-10 and PEGCU-7.

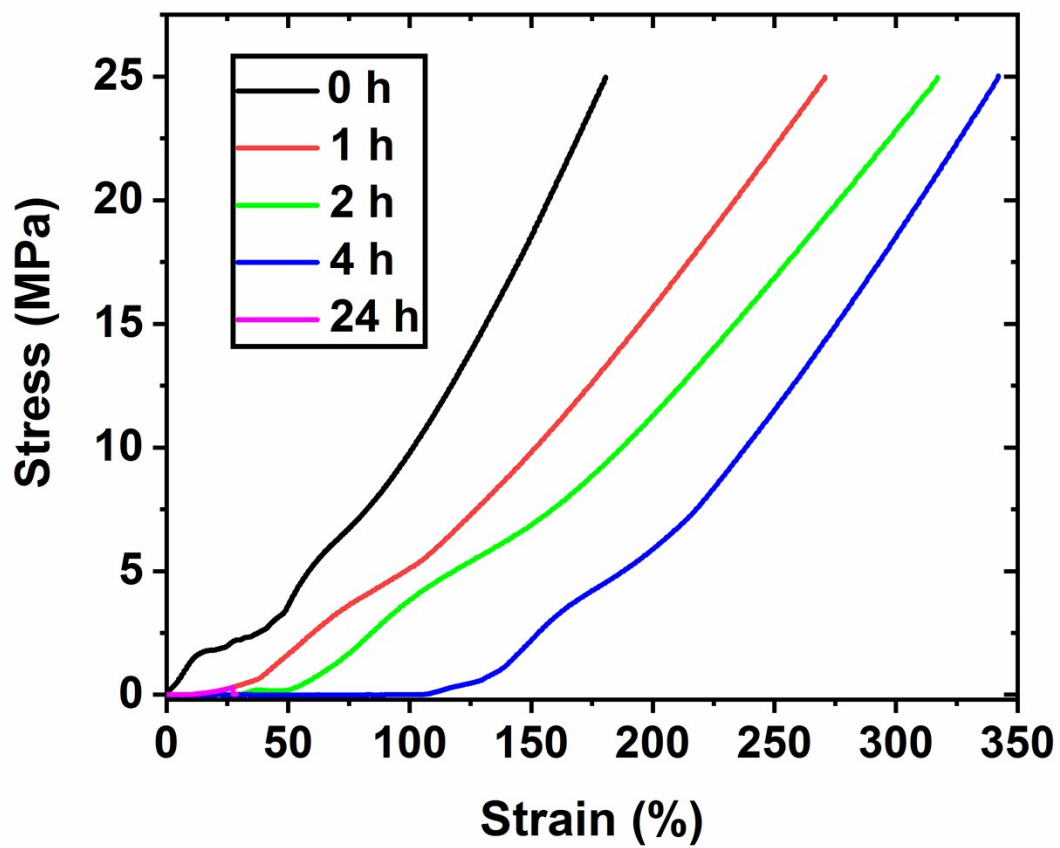

Figure S7. Compression test of PCBDU-1 with different hydrolysis time.

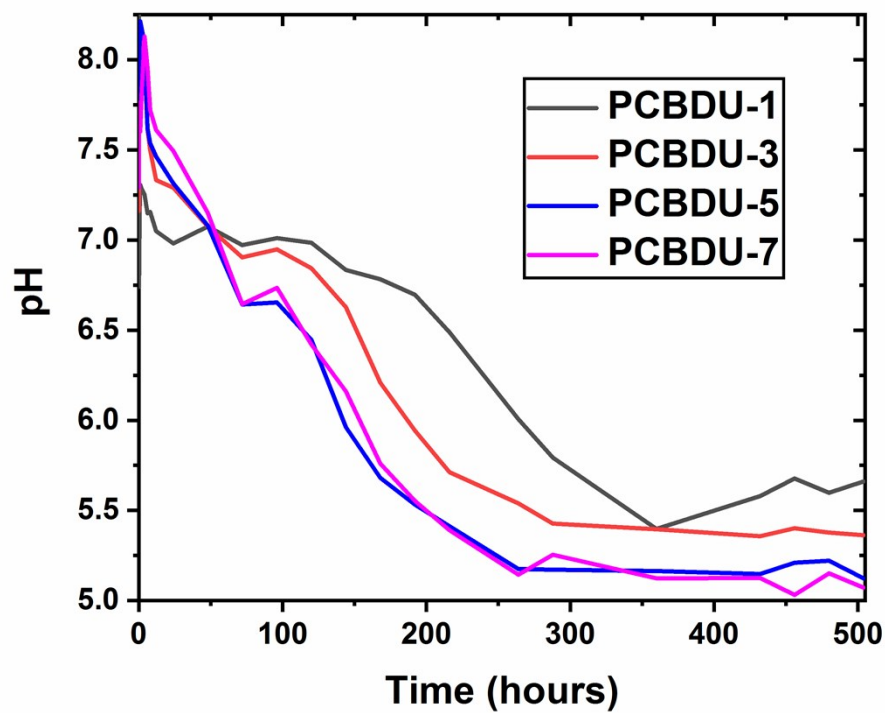

**Figure S8.** The pH change of the solution (DI water) during the hydrolysis of PCBDU s .

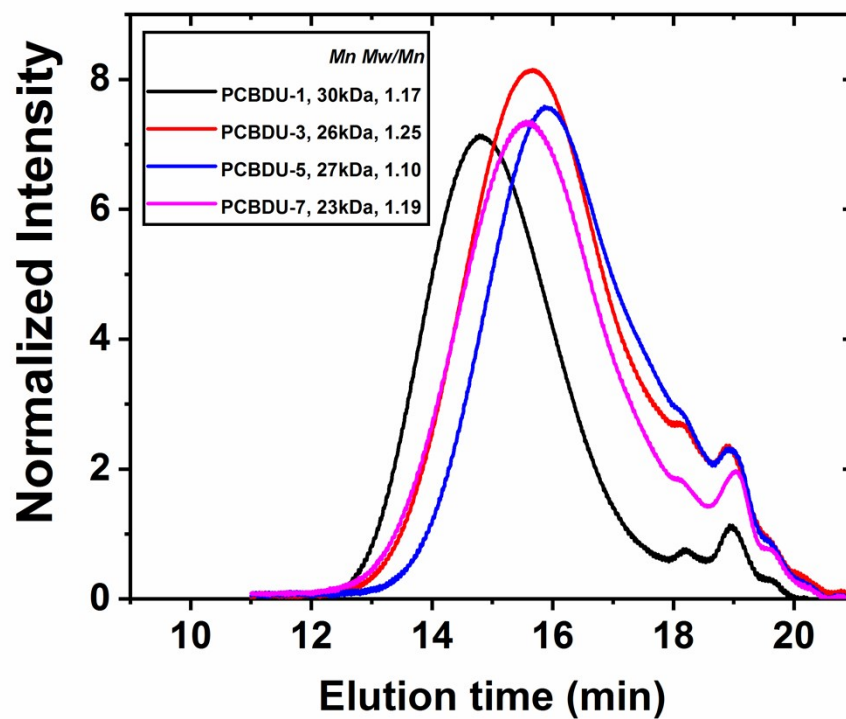

Figure S9. GPC spectrum for PCBDUs.

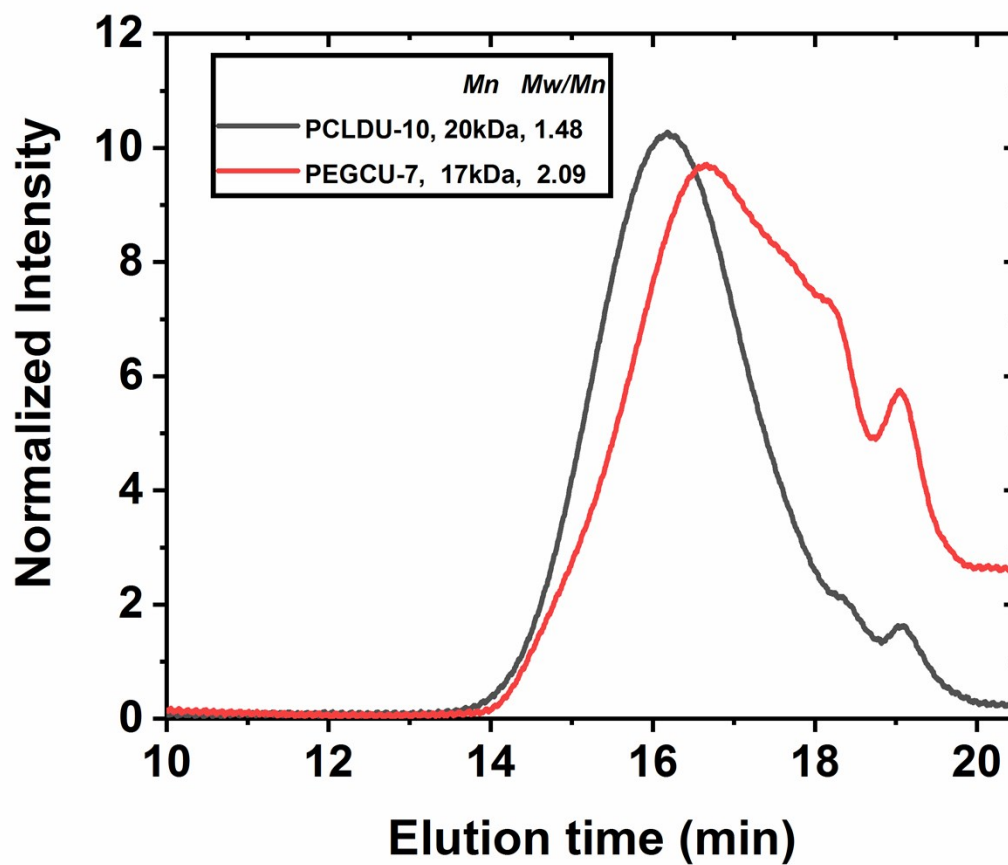

Figure S10. GPC spectrum for PCLDU-10 and PEGCU-7.



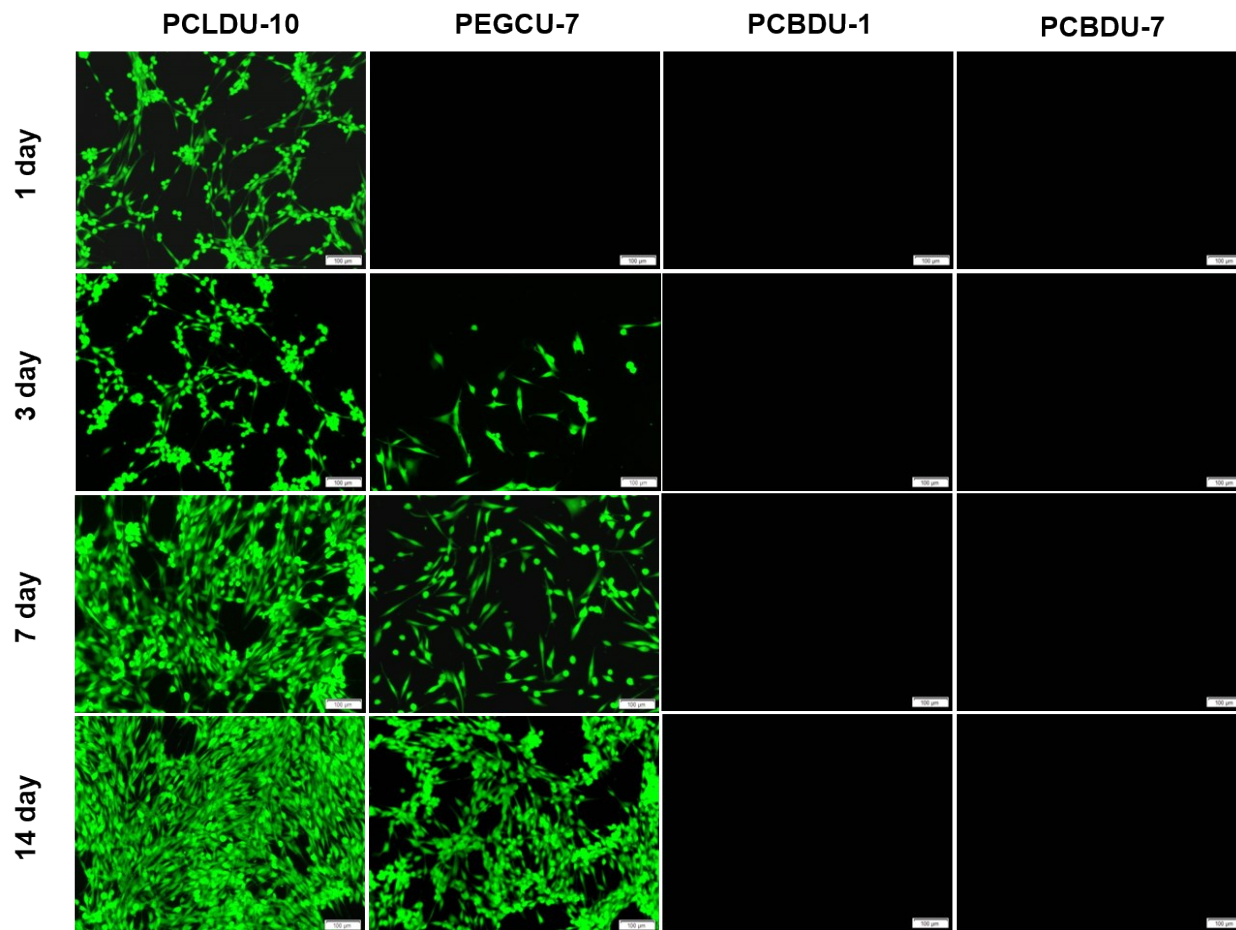

**Figure S11.** Images of the attachment of NIH-3T3 fibroblast cells on PCLDU-10, PEGCU-7, PCBDU-1 and PCBDU-7(after hydrolysis) after 1, 3, 7 and 14 days immersed in 100% FBS. The scale bar is 100  $\mu\text{m}$ .

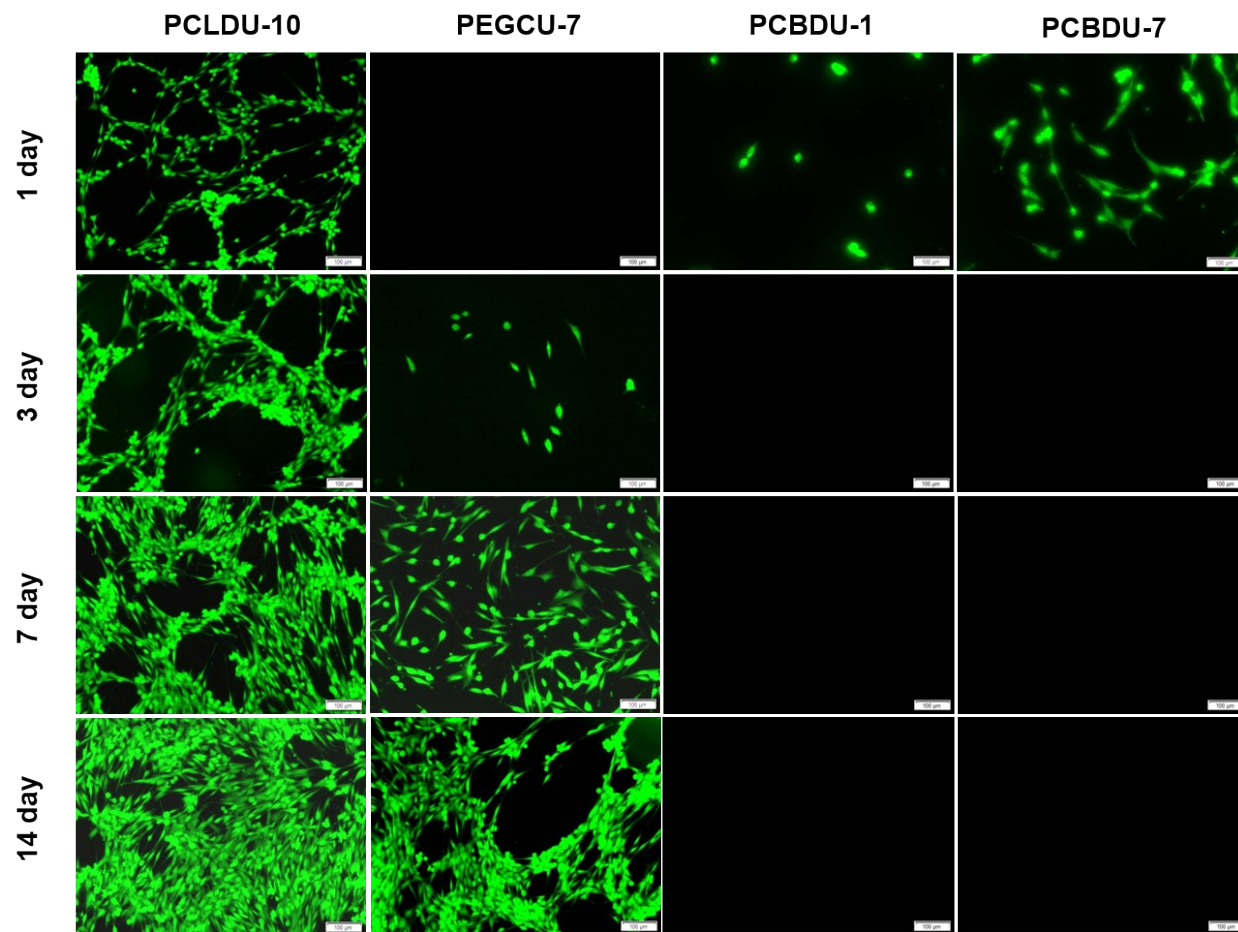

**Figure S12.** Images of the attachment of NIH-3T3 fibroblast cells on PCLDU-10, PEGCU-7, PCBDU-1 and PCBDU-7 (before hydrolysis) after 1, 3, 7 and 14 days immersed in 100% FBS.

The scale bar is 100  $\mu\text{m}$ .

**Table S2.** Cell densities on PCBUDs (after hydrolysis) and control surfaces with different times

| Cell densities ( $\times 10^4$ cells/cm <sup>2</sup> ) |                |                |                |                |               |               |
|--------------------------------------------------------|----------------|----------------|----------------|----------------|---------------|---------------|
|                                                        | PCLDU-10       | PEGCU-7        | PCBDU-1        | PCBDU-3        | PCBDU-5       | PCBDU-7       |
| 1 Day                                                  | 11.9 $\pm$ 1.1 | \              | 0.3 $\pm$ 0.03 | 0.2 $\pm$ 0.02 | 3.2 $\pm$ 0.2 | 1.6 $\pm$ 0.2 |
| 3 Days                                                 | 14.3 $\pm$ 0.5 | 0.4 $\pm$ 0.1  | \              | \              | \             | \             |
| 7 Days                                                 | 21.2 $\pm$ 0.9 | 5.3 $\pm$ 0.5  | \              | \              | \             | \             |
| 14 Days                                                | 23.5 $\pm$ 0.9 | 16.6 $\pm$ 0.8 | \              | \              | \             | \             |

immersed in FBS.

**Table S3.** Cell densities on PCBUDs (before hydrolysis) and control surfaces with different times immersed in FBS.

| Cell densities ( $\times 10^4$ cells/cm <sup>2</sup> ) |                |                |         |         |         |         |
|--------------------------------------------------------|----------------|----------------|---------|---------|---------|---------|
|                                                        | PCLDU-10       | PEGCU-7        | PCBDU-1 | PCBDU-3 | PCBDU-5 | PCBDU-7 |
| 1 Day                                                  | 10.6 $\pm$ 0.6 | \              | \       | \       | \       | \       |
| 3 Days                                                 | 12.6 $\pm$ 0.9 | 1.6 $\pm$ 0.7  | \       | \       | \       | \       |
| 7 Days                                                 | 21.6 $\pm$ 0.2 | 5.1 $\pm$ 0.4  | \       | \       | \       | \       |
| 14 Days                                                | 29.6 $\pm$ 0.1 | 21.4 $\pm$ 0.7 | \       | \       | \       | \       |

**Table S4.** Cell densities on PCBUDs (before hydrolysis) and control surfaces with different times

| Cell densities ( $\times 10^4$ cells/cm <sup>2</sup> ) |                |                |         |         |         |         |
|--------------------------------------------------------|----------------|----------------|---------|---------|---------|---------|
|                                                        | PCLDU-10       | PEGCU-7        | PCBDU-1 | PCBDU-3 | PCBDU-5 | PCBDU-7 |
| 1 Day                                                  | 20.5 $\pm$ 1.5 | 2.9 $\pm$ 0.4  | \       | \       | \       | \       |
| 3 Days                                                 | 24.1 $\pm$ 1.2 | 13.6 $\pm$ 1.1 | \       | \       | \       | \       |
| 7 Days                                                 | 25.1 $\pm$ 1.6 | 36.7 $\pm$ 3.5 | \       | \       | \       | \       |
| 14 Days                                                | 26.4 $\pm$ 1.9 | 38.9 $\pm$ 2.9 | \       | \       | \       | \       |

immersed in cell solution.
